# Supplementary material
Source: ML conference proceedings conference paper supplement (https://proceedings.mlr.press/v97/rahman19a.html)
Supplement: Supplementary file [file rahman19a-supp.pdf]

---

# Look Ma, No Latent Variables: Accurate Cutset Networks via Compilation

## Supplementary Material

---

Tahrima Rahman<sup>\*1</sup> Shasha Jin<sup>\*1</sup> Vibhav Gogate<sup>1</sup>

### Proof of Theorem 1

*Proof.* We prove this theorem by induction. Base case is trivially true.

In the inductive step, we assume that the theorem is true for depth  $d$  and prove that it also holds for depth  $d + 1$ .

Let  $\mathcal{C}$  be a cutset network having depth  $d$  and representing a probability distribution  $R_d$ . Without loss of generality, we assume that the OR tree in  $\mathcal{C}$  is balanced and complete. Let  $\mathcal{C}'$  be a cutset network representing a distribution  $R_{d+1}$  having depth  $d + 1$  constructed from  $\mathcal{C}$  as follows. Pick an arbitrary leaf node  $l$  of  $\mathcal{C}$ . Let  $T_l$  be the tree Bayesian network at  $l$  representing the distribution  $P_l$ . Replace  $T_l$  by the following cutset network stump (we call a cutset network having just one OR node and two tree Bayesian networks as leaf nodes of the OR node as a cutset network stump). Pick an arbitrary variable, say  $X$  in  $T_l$  as the root node of the cutset network stump. We consider two variations of the cutset network stump.

- **Variation 1:** Tree Bayesian networks attached to each of the two leaf nodes of the cutset network stump are learned using the Chow-Liu algorithm with the pairwise mutual information scores over all pairs of variables in  $V(T_l) \setminus \{X\}$  computed from the latent tractable model  $Q$ . Labels on the edges in the OR tree, namely  $P(X = 0)$  and  $P(X = 1)$  are computed by performing inference over  $Q$ . Let  $P^{(1)}$  be the distribution represented by the resulting cutset network stump.
- **Variation 2:** Tree Bayesian networks attached to each of the two leaf nodes of the cutset network stump are constructed using the following method. Tree Bayesian network at the left leaf and right leaf is constructed by setting  $X = 0$  and  $X = 1$  as evidence respectively in  $T_l$  and normalizing. Labels on the edges in the OR tree, namely  $P(X = 0)$  and  $P(X = 1)$  are computed

by performing inference over  $T_l$ . Let  $P^{(2)}$  be the distribution represented by the resulting cutset network stump.

By construction, Variation 2 yields a cutset network stump having the same distribution as  $T_l$ , namely  $P^{(2)} = P_l$ . Moreover, since Variation 1 uses the Chow-Liu algorithm and the latter is an optimal algorithm, each tree Bayesian network constructed using Variation 1 is superior (or the same) as the one using Variation 2 in terms of KL divergence computed with respect to  $Q(\mathbf{x}_{V(T_l)}|\mathbf{x}_{path(l)})$ . In other words, the KL divergence between  $Q(\mathbf{x}_{V(T_l)}|\mathbf{x}_{path(l)})$  and  $P^{(1)}$  is smaller than or equal to the KL divergence between  $Q(\mathbf{x}_{V(T_l)}|\mathbf{x}_{path(l)})$  and  $P^{(2)} = P_l$ . Therefore, it follows that the KL divergence between  $Q$  and  $R_{d+1}$  is smaller than or equal to the one between  $Q$  and  $R_d$ . Note that since  $X$  was chosen arbitrarily, it applies to any variable chosen (whether chosen heuristically or not) by Algorithm 1. This proves the inductive step and completes the proof.  $\square$

## Additional Experimental Results

### Density Estimation

In addition to algorithms CNxD and CN described in the main text of the paper, in the supplement we consider an additional variation CNx obtained via setting  $\alpha$  to 1 in Eq. (4). We call it CNx which stands for cutset networks learned using exact inference performed on the latent tractable model  $Q$  (and data is not used to compute the sufficient statistics). Figures 1 and 2 show the test set log-likelihood scores of CNxDs, CNxs and CNRs as a function of time for all the 20 datasets. We see that CNRs quickly reach a reasonable solution but are unable to improve their solution at the same rate as CNxDs and CNxs. In general, CNxDs are almost always better than CNxs, and when the time bound is sufficiently large, CNxDs outperform CNxs, CNRs and CNs and their performance approaches that of latent tractable models (BCNs and MTs).

---

<sup>\*</sup>Equal contribution <sup>1</sup>Department of Computer Science, The University of Texas at Dallas, United States. Correspondence to: Tahrima Rahman <tahrima.rahman@utdallas.edu>.

Table 1. Average test set log-likelihood scores of CNxDs, CNxs, CNs and CNRs.

| Dataset   | Average test set log-likelihood |                     |                    |                     |
|-----------|---------------------------------|---------------------|--------------------|---------------------|
|           | CNxD<br>$\alpha \in [0, 1]$     | CNx<br>$\alpha = 1$ | CN<br>$\alpha = 0$ | CNR<br>$\alpha = 1$ |
| nltes     | -6.01                           | -6.02               | -6.05              | <b>-5.97</b>        |
| msnbc     | -6.07                           | -6.08               | -6.05              | <b>-6.03</b>        |
| kdd       | <b>-2.15</b>                    | <b>-2.15</b>        | -2.19              | -2.16               |
| plants    | <b>-12.73</b>                   | -12.96              | -13.25             | -15.00              |
| audio     | <b>-40.69</b>                   | -40.82              | -41.97             | -41.97              |
| jester    | <b>-53.67</b>                   | -53.83              | -55.26             | -54.66              |
| netflix   | <b>-57.48</b>                   | -57.63              | -58.72             | -59.15              |
| accidents | <b>-30.12</b>                   | -30.38              | -30.66             | -38.54              |
| retail    | <b>-10.84</b>                   | -10.88              | -10.98             | -11.27              |
| pumsb*    | <b>-23.57</b>                   | -23.78              | -24.28             | -36.16              |
| dna       | -87.98                          | -88.59              | <b>-87.50</b>      | -96.63              |
| kosarek   | <b>-10.74</b>                   | -10.77              | -11.07             | -11.97              |
| msweb     | <b>-9.76</b>                    | -9.82               | -10.12             | -11.12              |
| book      | <b>-35.31</b>                   | -35.81              | -37.51             | -37.22              |
| movie     | <b>-54.61</b>                   | -55.42              | -57.71             | -65.95              |
| webkb     | <b>-155.77</b>                  | -157.98             | -161.58            | -172.13             |
| reuters   | <b>-85.89</b>                   | -86.55              | -87.64             | -101.16             |
| 20newsg   | <b>-155.66</b>                  | -156.71             | -161.68            | -164.34             |
| bbc       | <b>-253.50</b>                  | -260.65             | -260.55            | -271.98             |
| ad        | <b>-15.40</b>                   | -16.36              | -16.14             | -52.74              |
| Average   | <b>-55.40</b>                   | -56.16              | -57.05             | -62.81              |

**Prediction Accuracy: MAP Inference**

Tables 2 and 3 as well as Figures 3–7 compare the quality of MAP estimates output by various algorithms using the Hamming Loss and F1 score criteria respectively. We observe a similar trend to the log-likelihood criteria reported in the main paper: CNxDs dominate latent models (BCNs and MTs) as well as CNs (which are learned from data alone). CNRs is the worst performing method which shows the utility of structure learning.

Look Ma, No Latent Variables: Learning Accurate Cutset Networks via Compilation

Table 2. Hamming loss Comparison (Quality of MAP inference). Bold values indicate best scores obtained by CN, CNxD, CNR, MT or BCN.

| Datasets     | 20% Evidence  |               |               |                 |               | 50% Evidence  |        |               |                 |        | 80% Evidence  |        |               |                 |               |
|--------------|---------------|---------------|---------------|-----------------|---------------|---------------|--------|---------------|-----------------|--------|---------------|--------|---------------|-----------------|---------------|
|              | MAP Tractable |               |               | MAP Intractable |               | MAP Tractable |        |               | MAP Intractable |        | MAP Tractable |        |               | MAP Intractable |               |
|              | CNxD          | CN            | CNR           | MT              | BCN           | CNxD          | CN     | CNR           | MT              | BCN    | CNxD          | CN     | CNR           | MT              | BCN           |
| nlts         | <b>0.1998</b> | 0.2116        | 0.2032        | 0.2173          | 0.2220        | <b>0.1417</b> | 0.1615 | 0.1707        | 0.1647          | 0.1644 | <b>0.1270</b> | 0.1321 | 0.0957        | 0.1364          | 0.1300        |
| msnbc        | <b>0.1636</b> | 0.1849        | 0.1817        | 0.1979          | 0.1850        | 0.1636        | 0.1636 | <b>0.1349</b> | 0.1638          | 0.1638 | 0.1443        | 0.1448 | <b>0.1399</b> | 0.1456          | 0.1528        |
| kdd          | 0.0064        | 0.0064        | <b>0.0057</b> | 0.0064          | 0.0065        | <b>0.0055</b> | 0.0065 | 0.0069        | 0.0064          | 0.0065 | <b>0.0063</b> | 0.0069 | 0.0065        | 0.0065          | 0.0067        |
| plants       | <b>0.0903</b> | 0.1018        | 0.1007        | 0.0990          | 0.1022        | <b>0.0663</b> | 0.0710 | 0.0714        | 0.0713          | 0.0720 | <b>0.0495</b> | 0.0629 | 0.0693        | 0.0627          | 0.0630        |
| audio        | 0.1916        | 0.1921        | 0.1922        | <b>0.1894</b>   | 0.1899        | 0.1766        | 0.1796 | <b>0.1762</b> | 0.1783          | 0.1791 | <b>0.1682</b> | 0.1733 | 0.1686        | 0.1722          | 0.1724        |
| jester       | 0.3149        | 0.3160        | 0.3162        | 0.3160          | <b>0.3135</b> | <b>0.2664</b> | 0.2730 | 0.2710        | 0.2705          | 0.2724 | <b>0.2602</b> | 0.2724 | 0.2747        | 0.2639          | 0.2678        |
| netflix      | <b>0.3478</b> | 0.3526        | 0.3888        | 0.3849          | 0.3704        | <b>0.3028</b> | 0.3093 | 0.3033        | 0.3068          | 0.3065 | <b>0.2776</b> | 0.2873 | 0.2884        | 0.2820          | 0.2813        |
| accidents    | <b>0.1501</b> | 0.1622        | 0.1811        | 0.1664          | 0.1663        | <b>0.0939</b> | 0.1071 | 0.0999        | 0.1043          | 0.1059 | <b>0.0795</b> | 0.0945 | 0.0842        | 0.0902          | 0.0916        |
| retail       | <b>0.0210</b> | 0.0231        | 0.0250        | 0.0232          | 0.0232        | <b>0.0162</b> | 0.0217 | 0.0320        | 0.0219          | 0.0221 | <b>0.0115</b> | 0.0136 | 0.0116        | 0.0137          | 0.0141        |
| pumsb*       | <b>0.0804</b> | 0.0844        | 0.0832        | 0.0849          | 0.0841        | <b>0.0459</b> | 0.0499 | 0.0497        | 0.0489          | 0.0497 | <b>0.0414</b> | 0.0429 | 0.0477        | 0.0416          | 0.0427        |
| dna          | <b>0.3056</b> | 0.3239        | 0.3300        | 0.3421          | 0.3299        | <b>0.2466</b> | 0.2702 | 0.2675        | 0.2818          | 0.2813 | <b>0.2358</b> | 0.2471 | 0.2391        | 0.2379          | 0.2439        |
| kosarek      | <b>0.0160</b> | 0.0185        | 0.0183        | 0.0182          | 0.0183        | <b>0.0112</b> | 0.0170 | 0.0181        | 0.0168          | 0.0170 | 0.0199        | 0.0202 | <b>0.0149</b> | 0.0197          | 0.0202        |
| msweb        | 0.0114        | <b>0.0103</b> | 0.0115        | 0.0115          | 0.0120        | <b>0.0080</b> | 0.0106 | 0.0143        | 0.0114          | 0.0114 | <b>0.0102</b> | 0.0106 | 0.0184        | 0.0108          | 0.0109        |
| book         | <b>0.0163</b> | 0.0166        | 0.0166        | 0.0166          | 0.0166        | <b>0.0166</b> | 0.0170 | 0.0168        | 0.0168          | 0.0170 | <b>0.0152</b> | 0.0174 | 0.0155        | 0.0170          | 0.0173        |
| movie        | <b>0.0453</b> | 0.0478        | 0.0498        | 0.0487          | 0.0484        | <b>0.0388</b> | 0.0438 | 0.0434        | 0.0435          | 0.0434 | <b>0.0421</b> | 0.0437 | 0.0438        | 0.0423          | 0.0426        |
| webkb        | <b>0.0636</b> | 0.0643        | 0.0649        | 0.0645          | 0.0644        | 0.0609        | 0.0614 | <b>0.0584</b> | 0.0610          | 0.0608 | <b>0.0570</b> | 0.0577 | 0.0645        | 0.0572          | 0.0574        |
| reuters      | <b>0.0314</b> | 0.0318        | 0.0319        | 0.0319          | 0.0323        | <b>0.0284</b> | 0.0291 | 0.0291        | 0.0290          | 0.0289 | <b>0.0269</b> | 0.0287 | 0.0259        | 0.0282          | 0.0280        |
| 20newsg      | <b>0.0506</b> | 0.0528        | 0.0528        | 0.0522          | 0.0525        | <b>0.0493</b> | 0.0514 | 0.0504        | 0.0509          | 0.0513 | <b>0.0504</b> | 0.0513 | 0.0515        | 0.0502          | 0.0510        |
| bbc          | <b>0.0791</b> | 0.0798        | 0.0799        | 0.0801          | 0.0804        | 0.0778        | 0.0787 | <b>0.0761</b> | 0.0785          | 0.0769 | 0.0755        | 0.0774 | 0.0796        | 0.0769          | <b>0.0742</b> |
| ad           | <b>0.0027</b> | 0.0029        | 0.0029        | 0.0028          | 0.0030        | <b>0.0013</b> | 0.0015 | 0.0014        | 0.0015          | 0.0015 | <b>0.0009</b> | 0.0012 | 0.0011        | 0.0012          | 0.0011        |
| Average Loss | <b>0.1094</b> | 0.1142        | 0.1168        | 0.1177          | 0.1160        | <b>0.0909</b> | 0.0962 | 0.0946        | 0.0964          | 0.0966 | <b>0.0850</b> | 0.0893 | 0.0870        | 0.0878          | 0.0885        |
| Wins/Total   | <b>16/20</b>  | 1/20          | 1/20          | 1/20            | 1/20          | <b>16/20</b>  | 0/20   | 4/20          | 0/20            | 0/20   | <b>17/20</b>  | 0/20   | 2/20          | 0/20            | 1/20          |

Table 3. F1 Score Comparison (Quality of MAP inference). Bold values indicate highest score obtained by a model.

| Datasets         | 20% Evidence  |               |               |                 |        | 50% Evidence  |               |        |                 |              | 80% Evidence  |               |        |                 |        |
|------------------|---------------|---------------|---------------|-----------------|--------|---------------|---------------|--------|-----------------|--------------|---------------|---------------|--------|-----------------|--------|
|                  | MAP Tractable |               |               | MAP Intractable |        | MAP Tractable |               |        | MAP Intractable |              | MAP Tractable |               |        | MAP Intractable |        |
|                  | CNxD          | CN            | CNR           | MT              | BCN    | CNxD          | CN            | CNR    | MT              | BCN          | CNxD          | CN            | CNR    | MT              | BCN    |
| nlts             | <b>0.6756</b> | 0.2029        | 0.6686        | 0.2066          | 0.2128 | <b>0.6712</b> | 0.1435        | 0.6704 | 0.1439          | 0.1466       | <b>0.7541</b> | 0.1684        | 0.7508 | 0.1718          | 0.1646 |
| msnbc            | 0.1442        | 0.1812        | 0.1084        | <b>0.199</b>    | 0.1811 | <b>0.2282</b> | 0.1807        | 0.1832 | 0.1801          | 0.1824       | <b>0.512</b>  | 0.2382        | 0.4242 | 0.2408          | 0.242  |
| kdd              | <b>0.1089</b> | 0.0065        | 0.0842        | 0.0065          | 0.0066 | <b>0.1483</b> | 0.0057        | 0.1175 | 0.0056          | 0.0056       | <b>0.0993</b> | 0.007         | 0.0721 | 0.0065          | 0.0066 |
| plants           | <b>0.6768</b> | 0.0966        | 0.6117        | 0.0945          | 0.0976 | <b>0.7691</b> | 0.0683        | 0.6811 | 0.0702          | 0.07         | <b>0.7695</b> | 0.0535        | 0.6707 | 0.0506          | 0.052  |
| audio            | 0.1011        | <b>0.1924</b> | 0.0359        | 0.1883          | 0.1887 | <b>0.3395</b> | 0.1786        | 0.2425 | 0.1784          | 0.1794       | <b>0.4015</b> | 0.1793        | 0.2926 | 0.1776          | 0.1779 |
| jester           | <b>0.7606</b> | 0.3267        | 0.7457        | 0.3214          | 0.3196 | <b>0.7562</b> | 0.2716        | 0.7561 | 0.2685          | 0.2701       | <b>0.7923</b> | 0.2548        | 0.7837 | 0.2452          | 0.2534 |
| netflix          | 0.6538        | 0.3555        | <b>0.6654</b> | 0.4001          | 0.3753 | <b>0.6814</b> | 0.3231        | 0.6634 | 0.3197          | 0.3194       | <b>0.7268</b> | 0.2862        | 0.6931 | 0.2814          | 0.281  |
| accidents        | <b>0.3927</b> | 0.1597        | 0.3166        | 0.1586          | 0.1612 | <b>0.4761</b> | 0.0981        | 0.3281 | 0.0927          | 0.0939       | <b>0.6148</b> | 0.0845        | 0.3568 | 0.0765          | 0.0815 |
| retail           | 0.0066        | 0.0211        | 0.0004        | 0.0212          | 0.0211 | <b>0.0109</b> | 0.0163        | 0.0000 | 0.0164          | 0.0171       | <b>0.0169</b> | 0.0116        | 0.0007 | 0.0117          | 0.0118 |
| pumsb*           | <b>0.6252</b> | 0.0842        | 0.4941        | 0.0836          | 0.0827 | <b>0.6859</b> | 0.0475        | 0.5041 | 0.047           | 0.0479       | <b>0.7979</b> | 0.0572        | 0.5231 | 0.055           | 0.0564 |
| dna              | 0.2402        | 0.3261        | 0.1413        | <b>0.344</b>    | 0.3314 | 0.219         | 0.2659        | 0.0643 | 0.2779          | <b>0.278</b> | 0.195         | <b>0.2413</b> | 0.0522 | 0.2399          | 0.241  |
| kosarek          | <b>0.0372</b> | 0.0204        | 0.012         | 0.0201          | 0.02   | <b>0.0811</b> | 0.0113        | 0.0245 | 0.0112          | 0.0113       | <b>0.1338</b> | 0.0242        | 0.0674 | 0.024           | 0.0244 |
| msweb            | 0.0094        | 0.0115        | 0.0009        | <b>0.013</b>    | 0.0136 | <b>0.0402</b> | 0.0081        | 0.0023 | 0.0084          | 0.0085       | <b>0.0636</b> | 0.0102        | 0.0001 | 0.0103          | 0.0104 |
| book             | <b>0.0235</b> | 0.0164        | 0.0051        | 0.0164          | 0.0164 | <b>0.0587</b> | 0.0179        | 0.0082 | 0.0176          | 0.0179       | <b>0.0663</b> | 0.016         | 0.0209 | 0.0157          | 0.016  |
| movie            | <b>0.0938</b> | 0.0446        | 0.0284        | 0.0468          | 0.0462 | <b>0.1418</b> | 0.0395        | 0.072  | 0.0392          | 0.0395       | <b>0.2699</b> | 0.0521        | 0.1346 | 0.0513          | 0.051  |
| webkb            | 0.0335        | 0.0645        | 0.0073        | <b>0.0647</b>   | 0.0646 | <b>0.0865</b> | 0.0633        | 0.0158 | 0.0631          | 0.0629       | <b>0.1333</b> | 0.0602        | 0.0233 | 0.0595          | 0.0596 |
| reuters          | 0.0293        | <b>0.0315</b> | 0.0028        | 0.0312          | 0.0314 | <b>0.0749</b> | 0.0305        | 0.0088 | 0.0307          | 0.0303       | <b>0.1046</b> | 0.0284        | 0.0138 | 0.0273          | 0.0274 |
| 20newsg          | 0.0136        | <b>0.0528</b> | 0.0057        | 0.0523          | 0.0527 | 0.0333        | <b>0.0497</b> | 0.0069 | 0.0496          | 0.0496       | <b>0.075</b>  | 0.0543        | 0.0253 | 0.0533          | 0.0543 |
| bbc              | 0.0145        | 0.0793        | 0.0021        | <b>0.0794</b>   | 0.08   | 0.067         | <b>0.0793</b> | 0.005  | 0.0792          | 0.0778       | <b>0.1035</b> | 0.0783        | 0.0061 | 0.0773          | 0.075  |
| ad               | <b>0.5774</b> | 0.0029        | 0.035         | 0.0029          | 0.003  | <b>0.7548</b> | 0.0018        | 0.1384 | 0.0018          | 0.0018       | <b>0.7843</b> | 0.001         | 0.0931 | 0.0011          | 0.001  |
| Average F1 Score | <b>0.2609</b> | 0.1138        | 0.1986        | 0.1175          | 0.1153 | <b>0.3162</b> | 0.0950        | 0.2246 | 0.0951          | 0.0955       | <b>0.3707</b> | 0.0953        | 0.2502 | 0.0938          | 0.0944 |
| Wins/Total       | <b>11/20</b>  | 3/20          | 1/20          | 5/20            | 0/20   | <b>17/20</b>  | 2/20          | 0/20   | 0/20            | 1/20         | <b>19/20</b>  | 1/20          | 0/20   | 0/20            | 0/20   |

# Look Ma, No Latent Variables: Learning Accurate Cutset Networks via Compilation

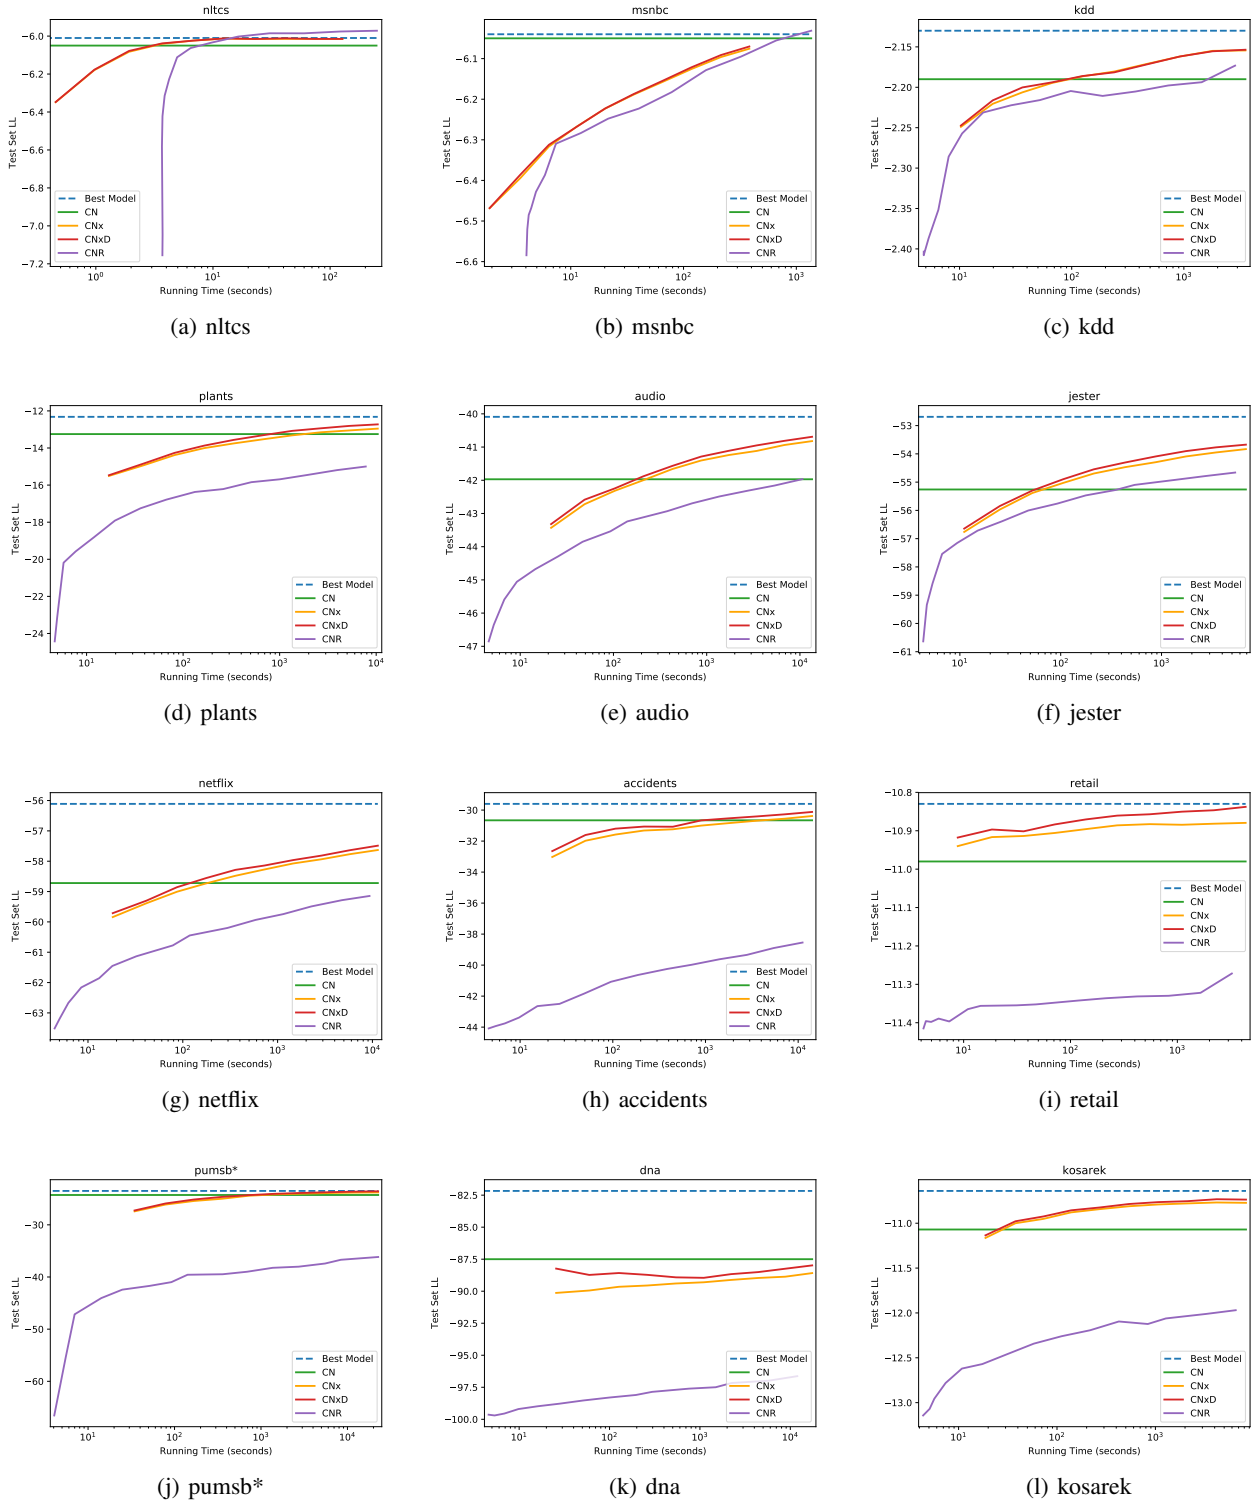

Figure 1. Average test set log-likelihood as a function of the running time on the first 12 datasets.

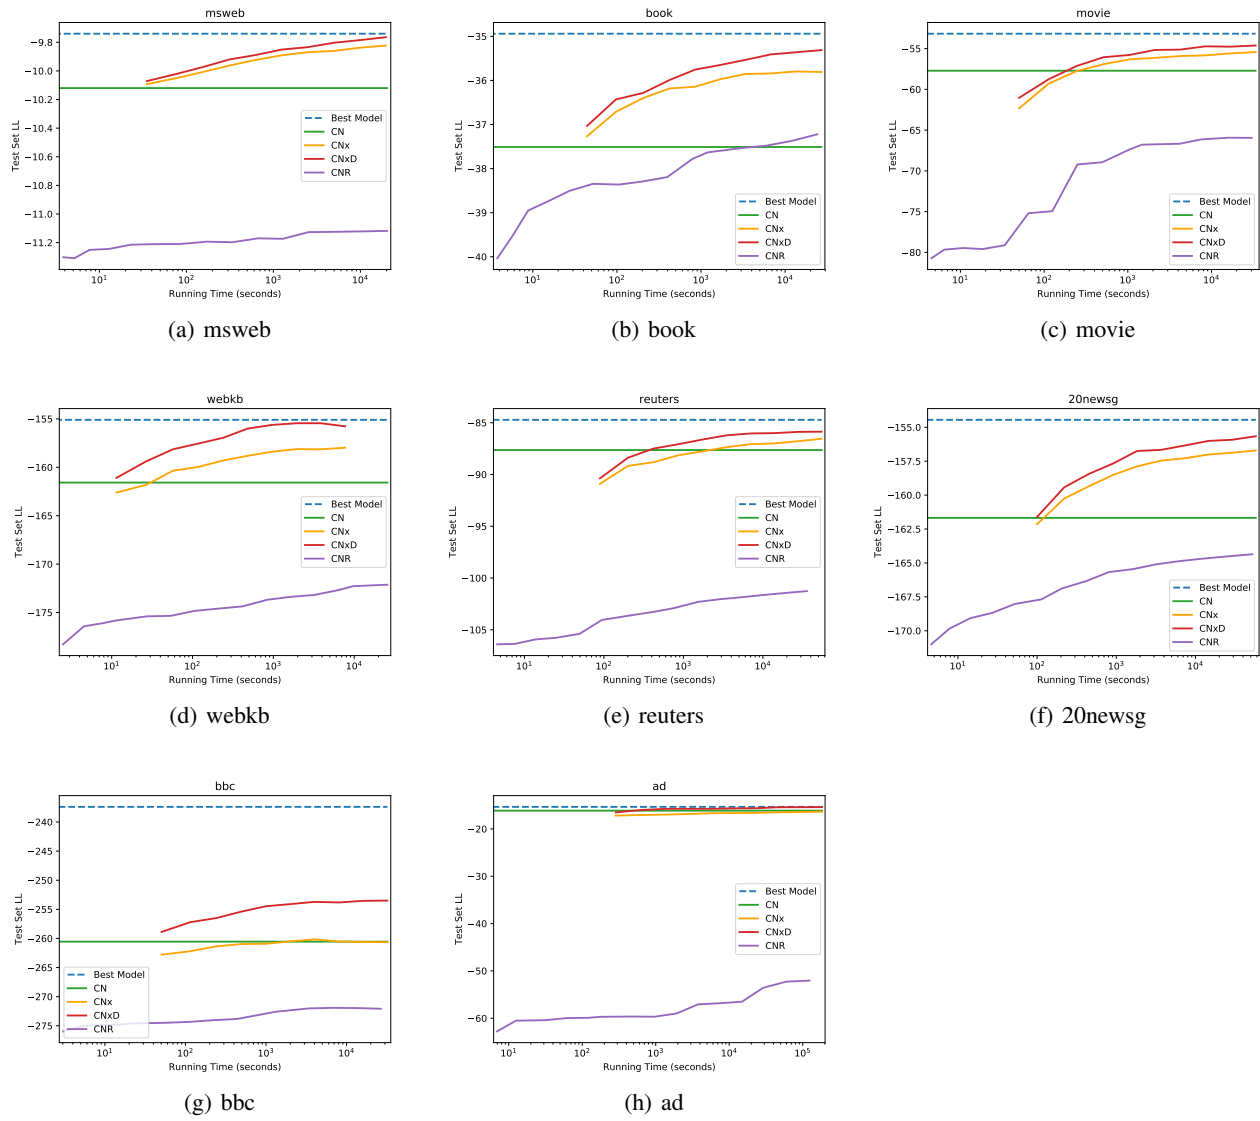

Figure 2. Average test set log-likelihood as a function of the running time on the last 8 datasets.

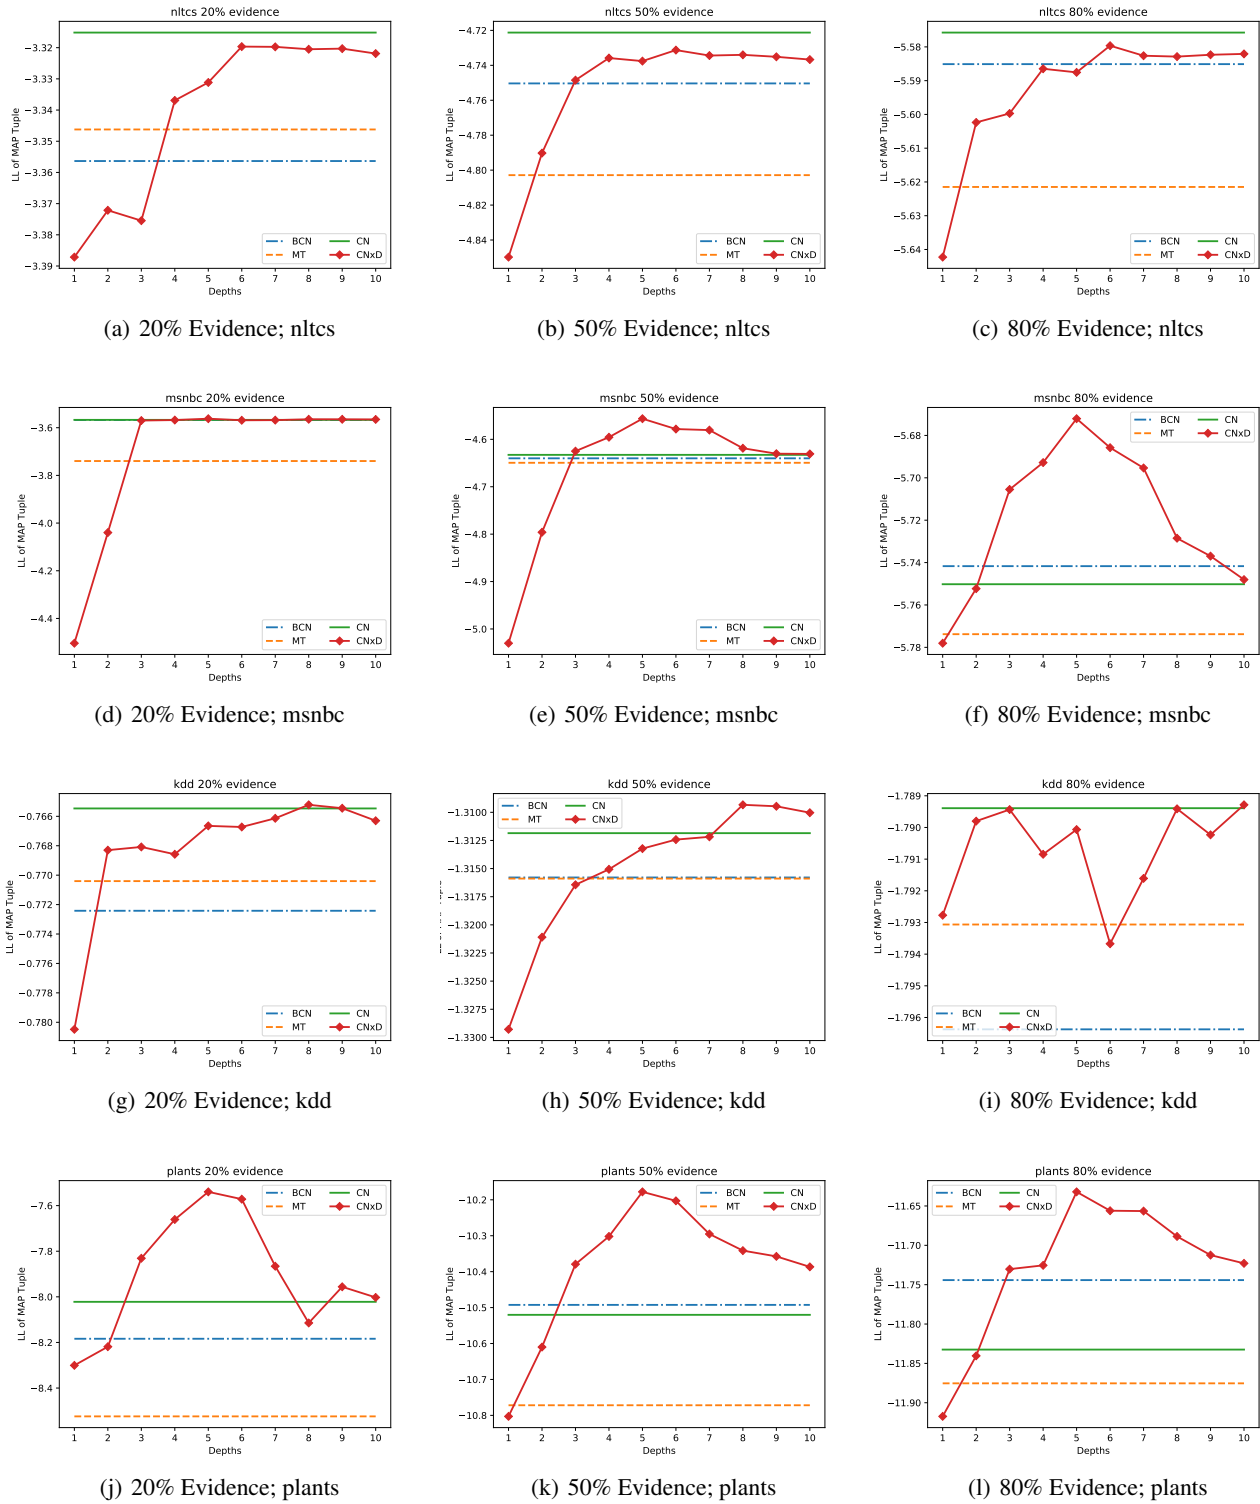

Figure 3. Average test set log-likelihood score of the MAP completion of evidence output by various algorithms as a function of the depth of the model on datasets nlts, msnbc, kdd, plants.

# Look Ma, No Latent Variables: Learning Accurate Cutset Networks via Compilation

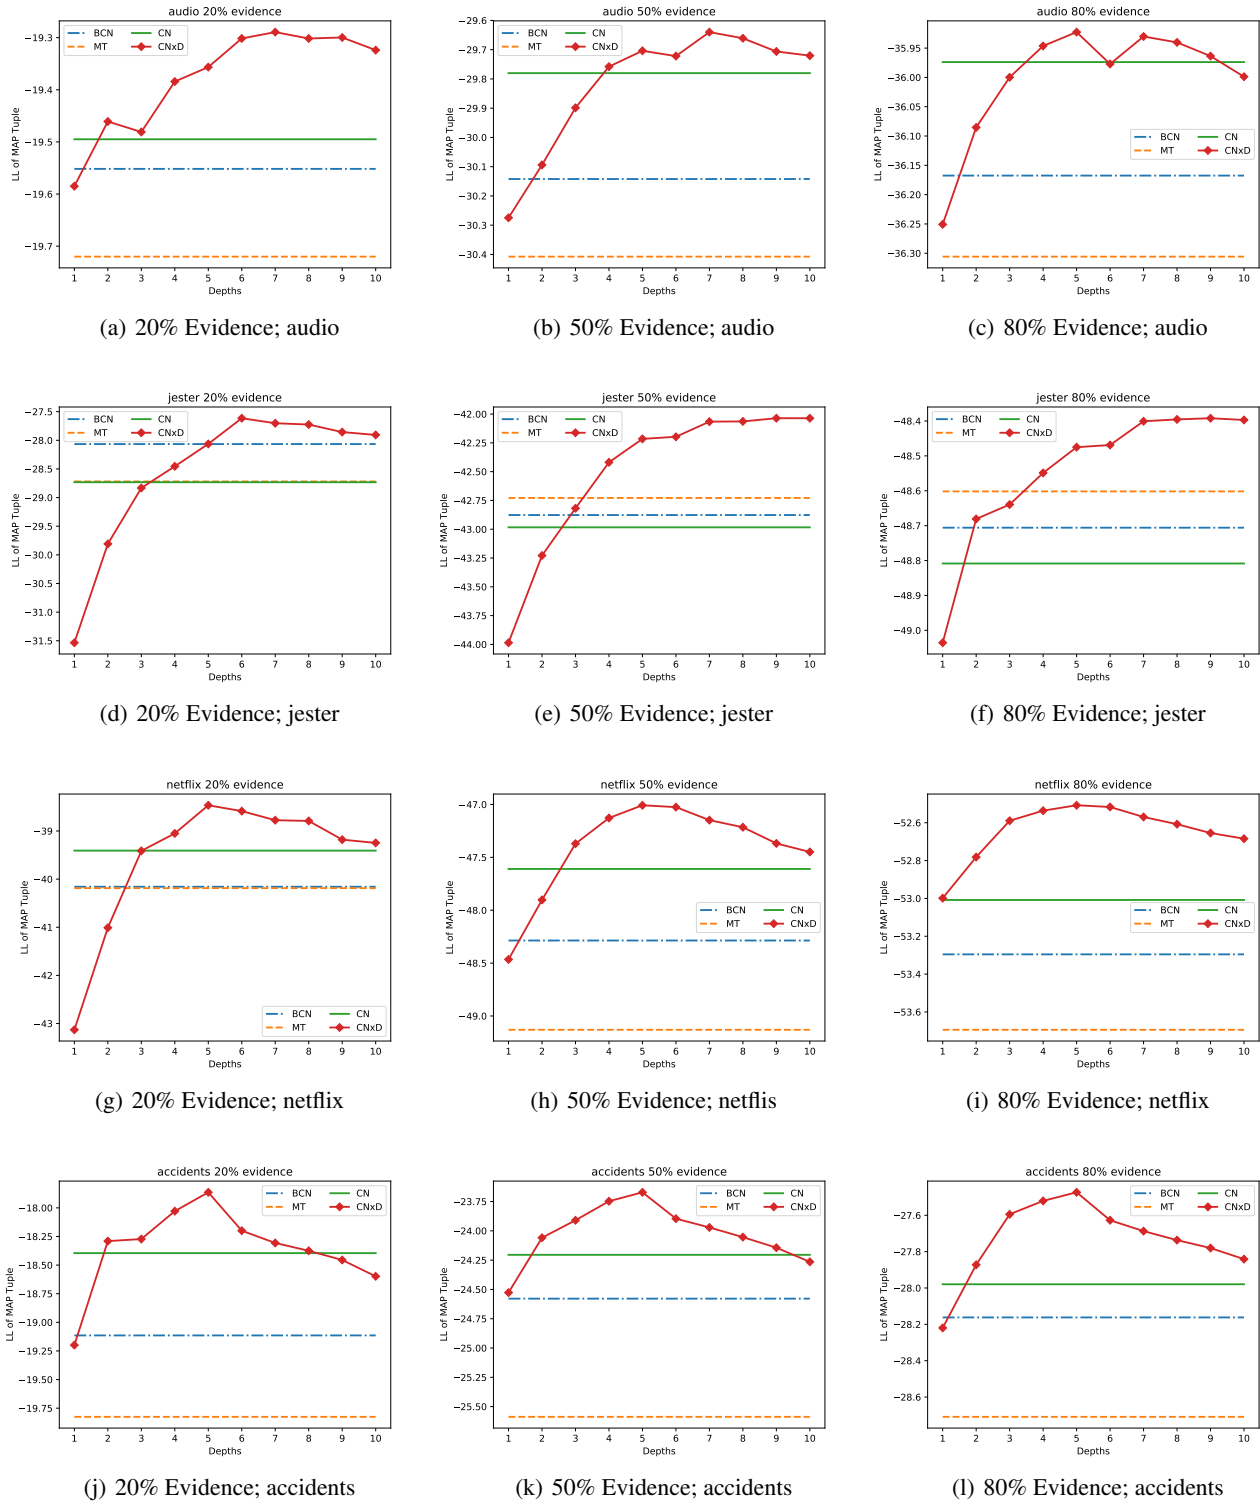

Figure 4. Average test set log-likelihood score of the MAP completion of evidence output by various algorithms as a function of the depth of the model on datasets audio, jester, netflix, accidents.

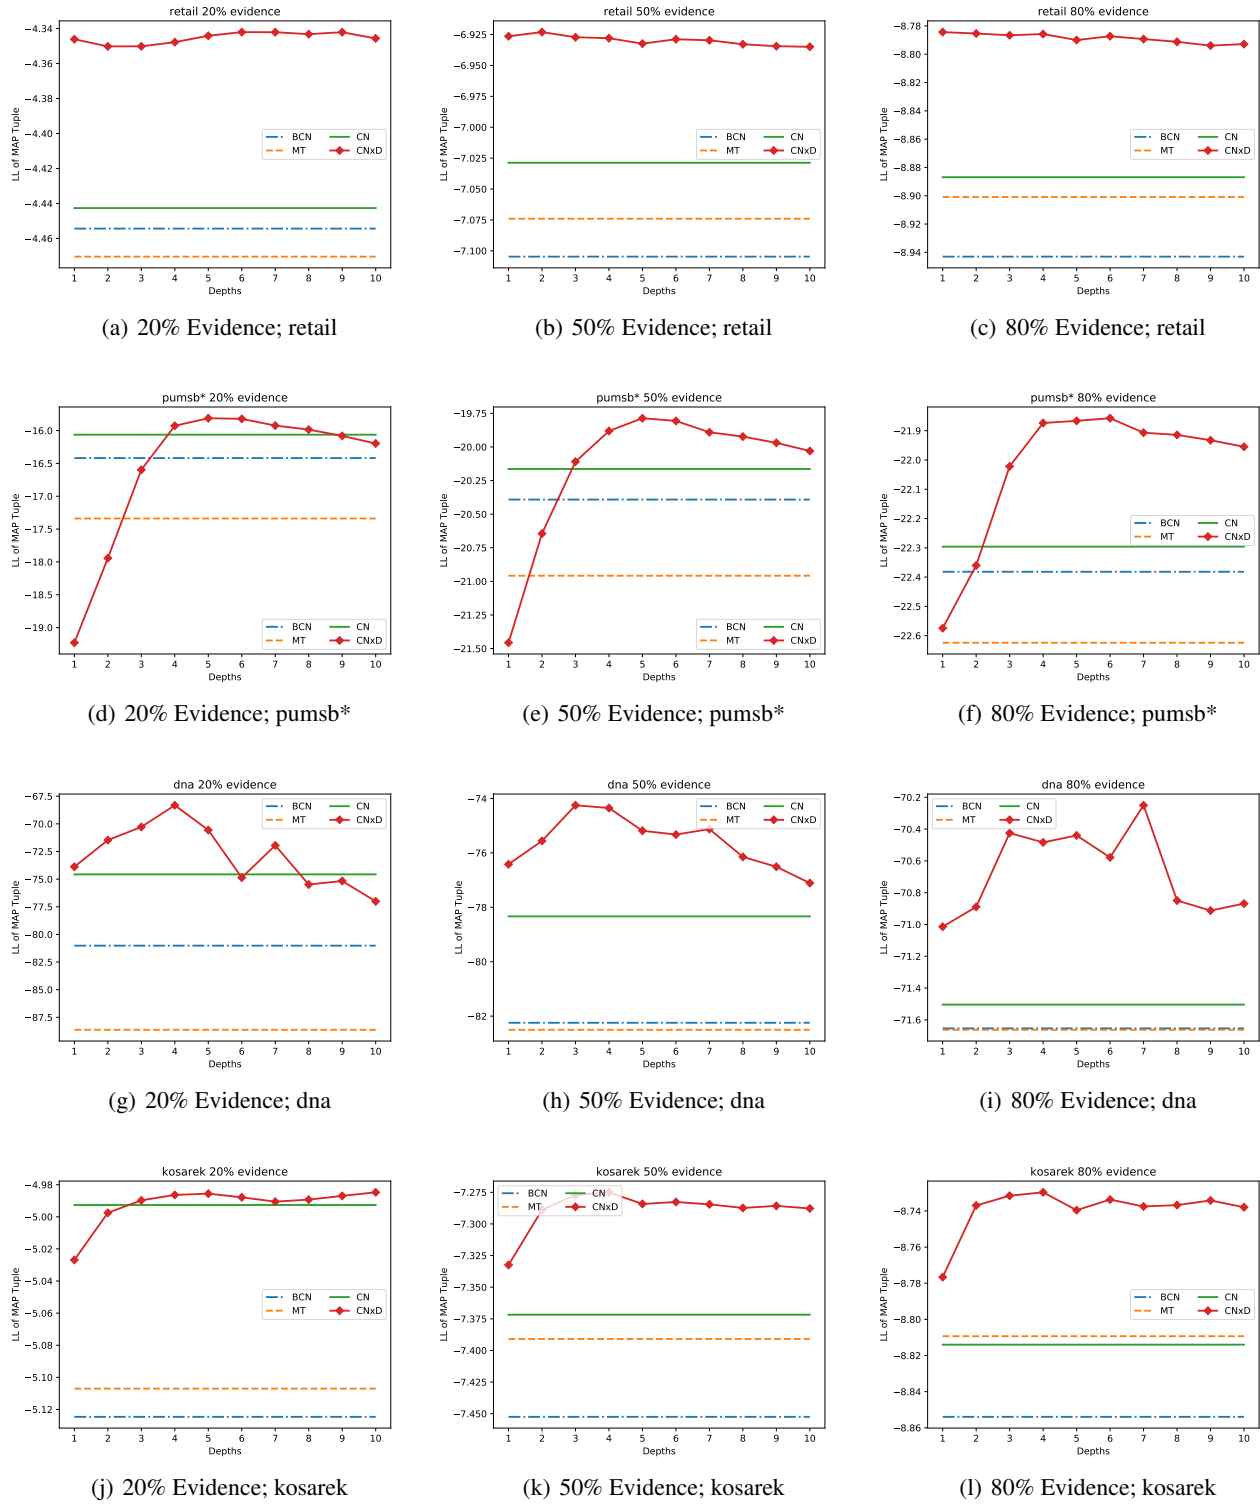

Figure 5. Average test set log-likelihood score of the MAP completion of evidence output by various algorithms as a function of the depth of the model on datasets retail, pumsb\*, dna, kosarek.



# Look Ma, No Latent Variables: Learning Accurate Cutset Networks via Compilation

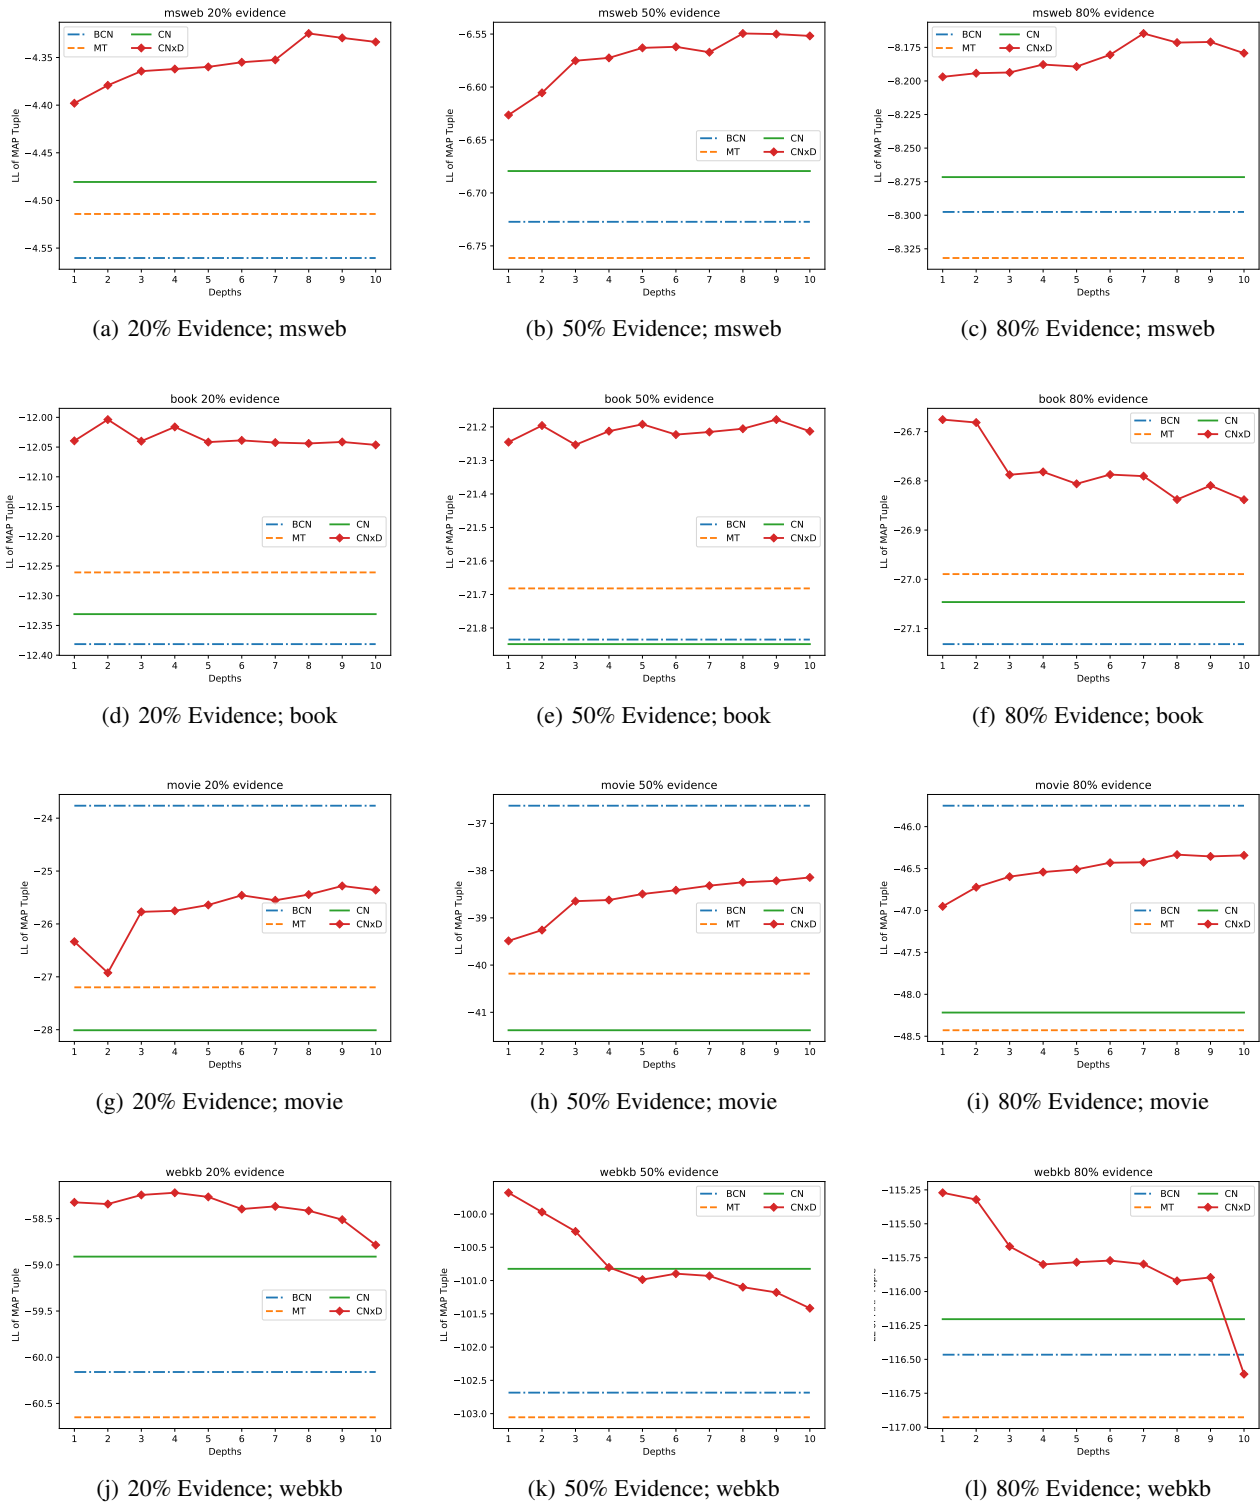

Figure 6. Average test set log-likelihood score of the MAP completion of evidence output by various algorithms as a function of the depth of the model on on datasets msweb, book, movie, webkb.

# Look Ma, No Latent Variables: Learning Accurate Cutset Networks via Compilation

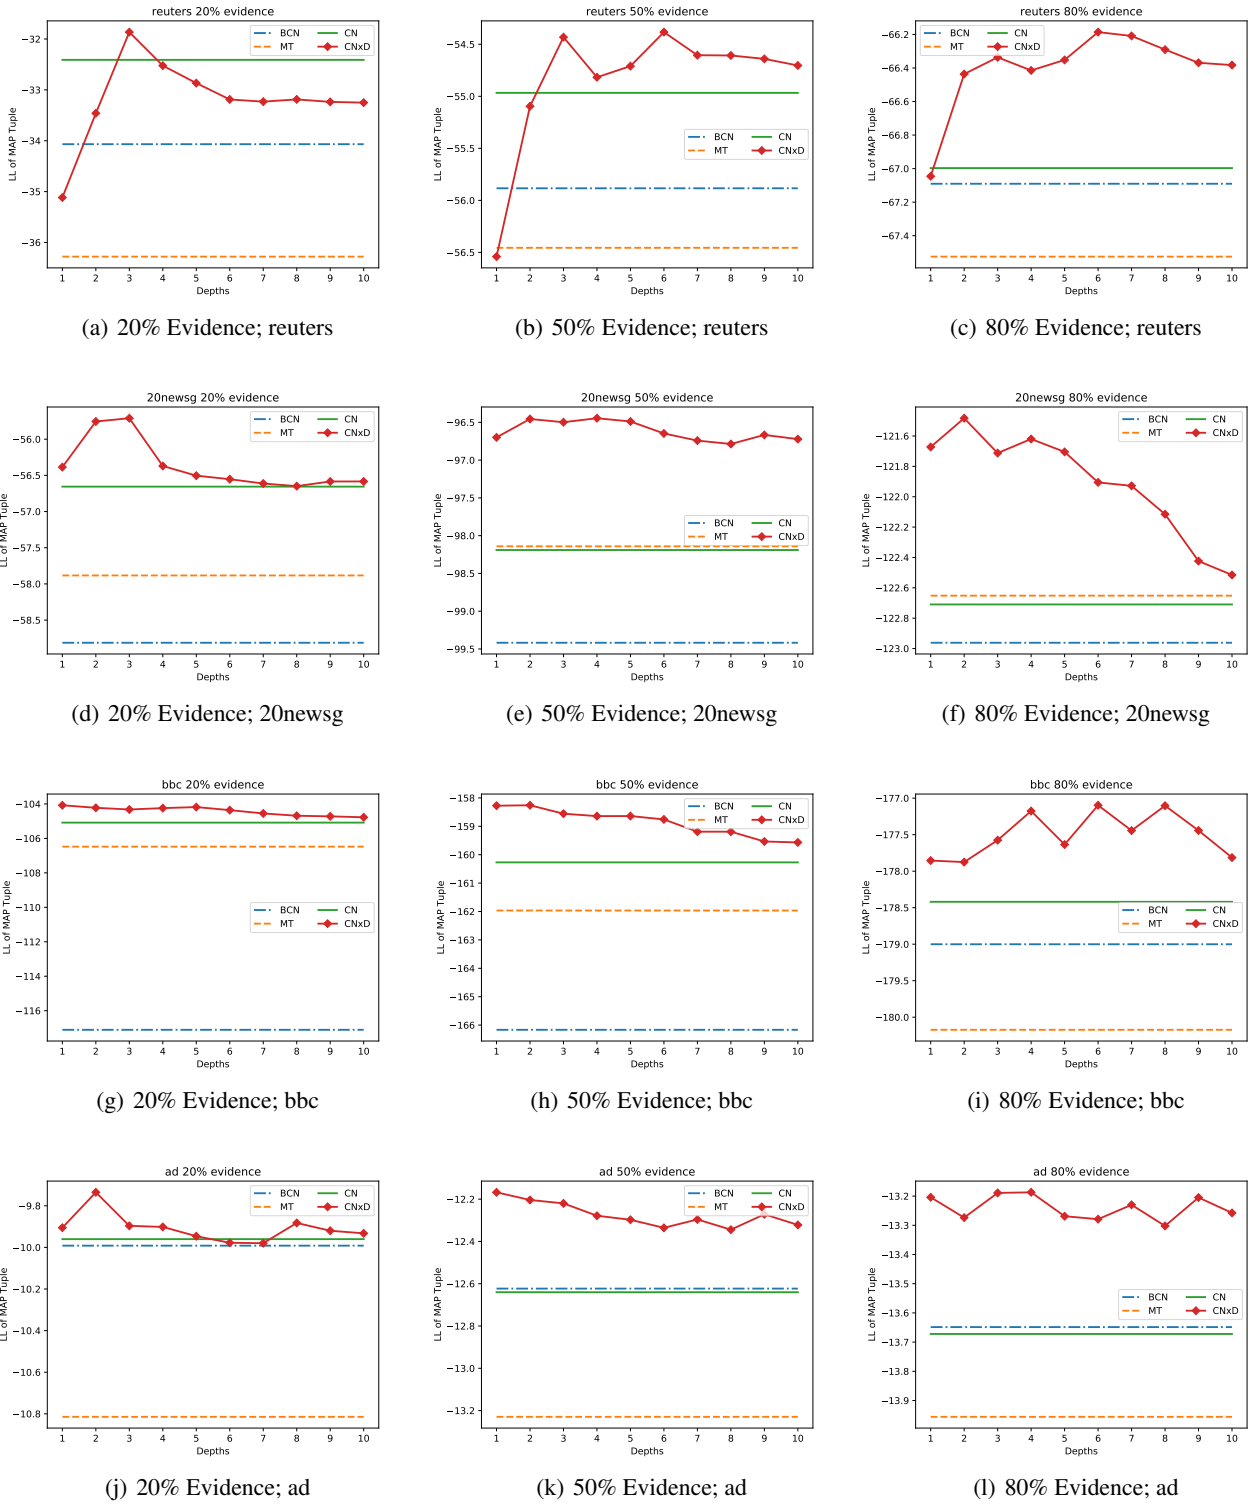

Figure 7. Average test set log-likelihood score of the MAP completion of evidence output by various algorithms as a function of the depth of the model on datasets reuters, 20newsg, bbc, ad.
